# Supplementary material
Source: PubMed Central journal article supplement (PMC3895928)
Supplement: NIHMS542050-supplement-01.pdf [file NIHMS542050-supplement-01.pdf]

# Physicians' Human Papillomavirus Vaccine Recommendations, 2009 and 2011

Susan T. Vadaparampil, PhD, Teri L. Malo, PhD, Jessica A. Kahn, MD, Daniel A. Salmon, PhD, Ji-Hyun Lee, DrPH, Gwendolyn P. Quinn, PhD, Richard G. Roetzheim, MD, Karen L. Bruder, MD, Tina M. Proveaux, BS, Xiuhua Zhao, MPH, Neal A. Halsey, MD, Anna R. Giuliano, PhD

## Appendix A

**U.S. physicians' demographic, practice, and patient characteristics; knowledge; perceived issues/barriers; and vaccine practices, 2009 and 2011**

|                                    | 2009<br>(n=1008) <sup>a</sup><br>n (%) | 2011<br>(n=928)<br>n (%) | p-value <sup>b</sup> |
|------------------------------------|----------------------------------------|--------------------------|----------------------|
| <b>DEMOGRAPHIC CHARACTERISTICS</b> |                                        |                          |                      |
| <b>Provider specialty</b>          |                                        |                          |                      |
| Pediatrics                         | 287 (28.5)                             | 322 (34.7)               |                      |
| Family physician                   | 499 (49.5)                             | 406 (43.8)               | <b>0.009</b>         |
| Obstetrics/gynecology              | 222 (22.0)                             | 200 (21.6)               |                      |
| <b>Age, years</b>                  |                                        |                          |                      |
| 25-39                              | 239 (23.7)                             | 180 (19.4)               |                      |
| 40-49                              | 327 (32.4)                             | 338 (36.4)               | <b>0.04</b>          |
| 50-65                              | 422 (41.9)                             | 383 (41.3)               |                      |
| <b>Gender</b>                      |                                        |                          |                      |
| Male                               | 528 (52.4)                             | 455 (49.0)               | 0.13                 |
| Female                             | 466 (46.2)                             | 461 (49.7)               |                      |
| <b>Race</b>                        |                                        |                          |                      |
| White/Caucasian                    | 737 (73.1)                             | 665 (71.7)               | 0.55                 |
| Other                              | 252 (25.0)                             | 242 (26.1)               |                      |
| <b>Ethnicity</b>                   |                                        |                          |                      |
| Hispanic or Latino                 | 62 (6.2)                               | 54 (5.8)                 | 0.80                 |
| Not Hispanic or Latino             | 920 (91.3)                             | 841 (90.6)               |                      |
| <b>PRACTICE CHARACTERISTICS</b>    |                                        |                          |                      |
| <b>Number of physicians</b>        |                                        |                          |                      |
| 1                                  | 170 (16.9)                             | 186 (20.0)               |                      |
| 2-15                               | 695 (68.9)                             | 633 (68.2)               | 0.06                 |
| ≥16                                | 132 (13.1)                             | 96 (10.3)                |                      |
| <b>Number of specialties</b>       |                                        |                          |                      |
| Single                             | 702 (69.6)                             | 676 (72.8)               |                      |
| Multiple                           | 248 (24.6)                             | 207 (22.3)               | 0.15                 |
| Other                              | 43 (4.3)                               | 28 (3.0)                 |                      |
| <b>Type</b>                        |                                        |                          |                      |
| Private practice                   | 728 (72.2)                             | 662 (71.3)               | 0.72                 |
| Other                              | 267 (26.5)                             | 252 (27.2)               |                      |

|                                                                               | 2009<br>(n=1008) <sup>a</sup><br>n (%) | 2011<br>(n=928)<br>n (%) | p-value <sup>b</sup> |
|-------------------------------------------------------------------------------|----------------------------------------|--------------------------|----------------------|
| <b>Arrangement</b>                                                            |                                        |                          |                      |
| Full/part-owner physician practice                                            | 472 (46.8)                             | 455 (49.0)               | 0.27                 |
| Other                                                                         | 522 (51.8)                             | 455 (49.0)               |                      |
| <b>Number of patients/day</b>                                                 |                                        |                          |                      |
| 0-19                                                                          | 258 (25.6)                             | 274 (29.5)               |                      |
| 20-29                                                                         | 500 (49.6)                             | 465 (50.1)               | <b>0.03</b>          |
| ≥30                                                                           | 232 (23.0)                             | 173 (18.6)               |                      |
| <b>Location</b>                                                               |                                        |                          |                      |
| Urban                                                                         | 289 (28.7)                             | 250 (26.9)               |                      |
| Suburban                                                                      | 506 (50.2)                             | 491 (52.9)               | 0.51                 |
| Rural                                                                         | 182 (18.1)                             | 153 (16.5)               |                      |
| Other                                                                         | 7 (0.7)                                | 9 (1.0)                  |                      |
| <b>Region</b>                                                                 |                                        |                          |                      |
| Northeast                                                                     | 194 (19.3)                             | 192 (20.7)               |                      |
| Midwest                                                                       | 247 (24.5)                             | 219 (23.6)               | 0.74                 |
| South                                                                         | 334 (33.1)                             | 315 (33.9)               |                      |
| West                                                                          | 210 (20.8)                             | 180 (19.4)               |                      |
| <b>Vaccines for Children provider</b>                                         |                                        |                          |                      |
| Yes                                                                           | 405 (40.2)                             | 436 (47.0)               |                      |
| No                                                                            | 475 (47.1)                             | 371 (40.0)               | <b>0.005</b>         |
| Don't know                                                                    | 112 (11.1)                             | 101 (10.9)               |                      |
| <b>Refer uninsured patients for vaccine</b>                                   |                                        |                          |                      |
| No or not applicable                                                          | 466 (46.2)                             | 515 (55.5)               | <b>&lt;0.001</b>     |
| Yes, to federally qualified health center/health department/other             | 542 (53.8)                             | 413 (44.5)               |                      |
| <b>Refer underinsured patients for vaccine</b>                                |                                        |                          |                      |
| No or not applicable                                                          | 489 (48.5)                             | 518 (55.8)               | <b>0.001</b>         |
| Yes, to federally qualified health center/health department/other             | 519 (51.5)                             | 410 (44.2)               |                      |
| <b>PATIENT CHARACTERISTICS</b>                                                |                                        |                          |                      |
| <b>Patient payment method</b>                                                 |                                        |                          |                      |
| <b>Private insurance, % of patients</b>                                       |                                        |                          |                      |
| 0-50                                                                          | 427 (42.4)                             | 413 (44.5)               | 0.37                 |
| 51-100                                                                        | 527 (52.3)                             | 469 (50.5)               |                      |
| <b>Patient race (majority)</b>                                                |                                        |                          |                      |
| Non-Hispanic white                                                            | 735 (72.9)                             | 647 (69.7)               | 0.09                 |
| Other                                                                         | 256 (25.4)                             | 268 (28.9)               |                      |
| <b>HPV knowledge<sup>c</sup></b>                                              |                                        |                          |                      |
| Low                                                                           | 380 (37.7)                             | 346 (37.3)               | 0.98                 |
| High                                                                          | 628 (62.3)                             | 573 (61.7)               |                      |
| <b>Perceived issues/barriers<sup>d</sup> related to HPV vaccination</b>       |                                        |                          |                      |
| <b>Overall</b>                                                                |                                        |                          |                      |
| Low                                                                           | 347 (34.4)                             | 298 (32.1)               |                      |
| Medium                                                                        | 281 (27.9)                             | 303 (32.7)               | 0.09                 |
| High                                                                          | 357 (35.4)                             | 313 (33.7)               |                      |
| <b>Individual (% somewhat/strongly agree is an issue/barrier<sup>d</sup>)</b> |                                        |                          |                      |
| Vaccine safety                                                                | 719 (71.3)                             | 160 (17.2)               | <b>&lt;0.001</b>     |

|                                                               | <b>2009<br/>(n=1008)<sup>a</sup></b> | <b>2011<br/>(n=928)</b> |                            |
|---------------------------------------------------------------|--------------------------------------|-------------------------|----------------------------|
|                                                               | <b>n (%)</b>                         | <b>n (%)</b>            | <b>p-value<sup>b</sup></b> |
| Vaccine efficacy                                              | 715 (70.9)                           | 145 (15.6)              | <b>&lt;0.001</b>           |
| Discussing sexuality/sexually transmitted infections          | 669 (66.4)                           | 104 (11.2)              | <b>&lt;0.001</b>           |
| Teens practicing riskier sexual behaviors                     | 476 (47.2)                           | 109 (11.7)              | <b>&lt;0.001</b>           |
| Administering new vaccine with limited track record of safety | 527 (52.3)                           | 324 (34.9)              | <b>&lt;0.001</b>           |
| Adding another vaccine to schedule                            | 372 (36.9)                           | 236 (25.4)              | <b>&lt;0.001</b>           |
| Lack of information about vaccine                             | 210 (20.8)                           | 135 (14.5)              | <b>&lt;0.001</b>           |
| Up-front cost of purchasing vaccine                           | 531 (52.7)                           | 421 (45.4)              | <b>&lt;0.001</b>           |
| Cost of stocking vaccine                                      | 509 (50.5)                           | 387 (41.7)              | <b>&lt;0.001</b>           |
| Lack of adequate reimbursement                                | 519 (51.5)                           | 443 (47.7)              | 0.06                       |
| Some insurance does not cover vaccine                         | 651 (64.6)                           | 573 (61.7)              | 0.12                       |
| Time to discuss vaccination with patients/parents             | 272 (27.0)                           | 200 (21.6)              | <b>0.004</b>               |
| Difficulty ensuring series completion                         | 434 (43.1)                           | 327 (35.2)              | <b>&lt;0.001</b>           |
| Vaccine not required for school                               | 295 (29.3)                           | 296 (31.9)              | 0.28                       |
| <b>VACCINE PRACTICES</b>                                      |                                      |                         |                            |
| <b>Strategies to ensure HPV vaccine completion</b>            |                                      |                         |                            |
| 0                                                             | 121 (12.0)                           | 151 (16.3)              |                            |
| 1                                                             | 163 (16.2)                           | 194 (20.9)              | <b>&lt;0.001</b>           |
| ≥2                                                            | 662 (65.7)                           | 540 (58.2)              |                            |

Note: Boldface indicates significance,  $p < 0.05$ . Percentages may not sum to 100% due to missing data.

<sup>a</sup> Five surveys were received after the data collection period in 2009; thus, 1008 surveys were included in the analyses.

<sup>b</sup>  $p$ -values reflect analyses that compare study years, rather than categories within each variable.

<sup>c</sup> Low knowledge=0–4 correct responses in 2009 and 0–7 correct responses in 2011. High knowledge=5–6 correct responses in 2009 and 8–10 correct responses in 2011.

<sup>d</sup> The term “issue” was used in 2009; the term “barrier” was used in 2011.

HPV, human papillomavirus
